# Supplementary material for: The Role of Non-Governmental Organizations in Combating Malnutrition in Yemen: A Systematic Review of Interventions, Effectiveness, and Impact (2020-2025)
Source: Research Square preprint supplement (doi:10.21203/rs.3.rs-8231117/v1), 2025-12-02
Supplement: Supplementary file 1 [file 4be28f0183b6d63fd01995e7.docx]

# SUPPLEMENTARY MATERIALS

## The Role of Non-Governmental Organizations in Combating Malnutrition in Yemen: A Systematic Review

### Figure 1: PRISMA FLOW DIAGRAM DATA


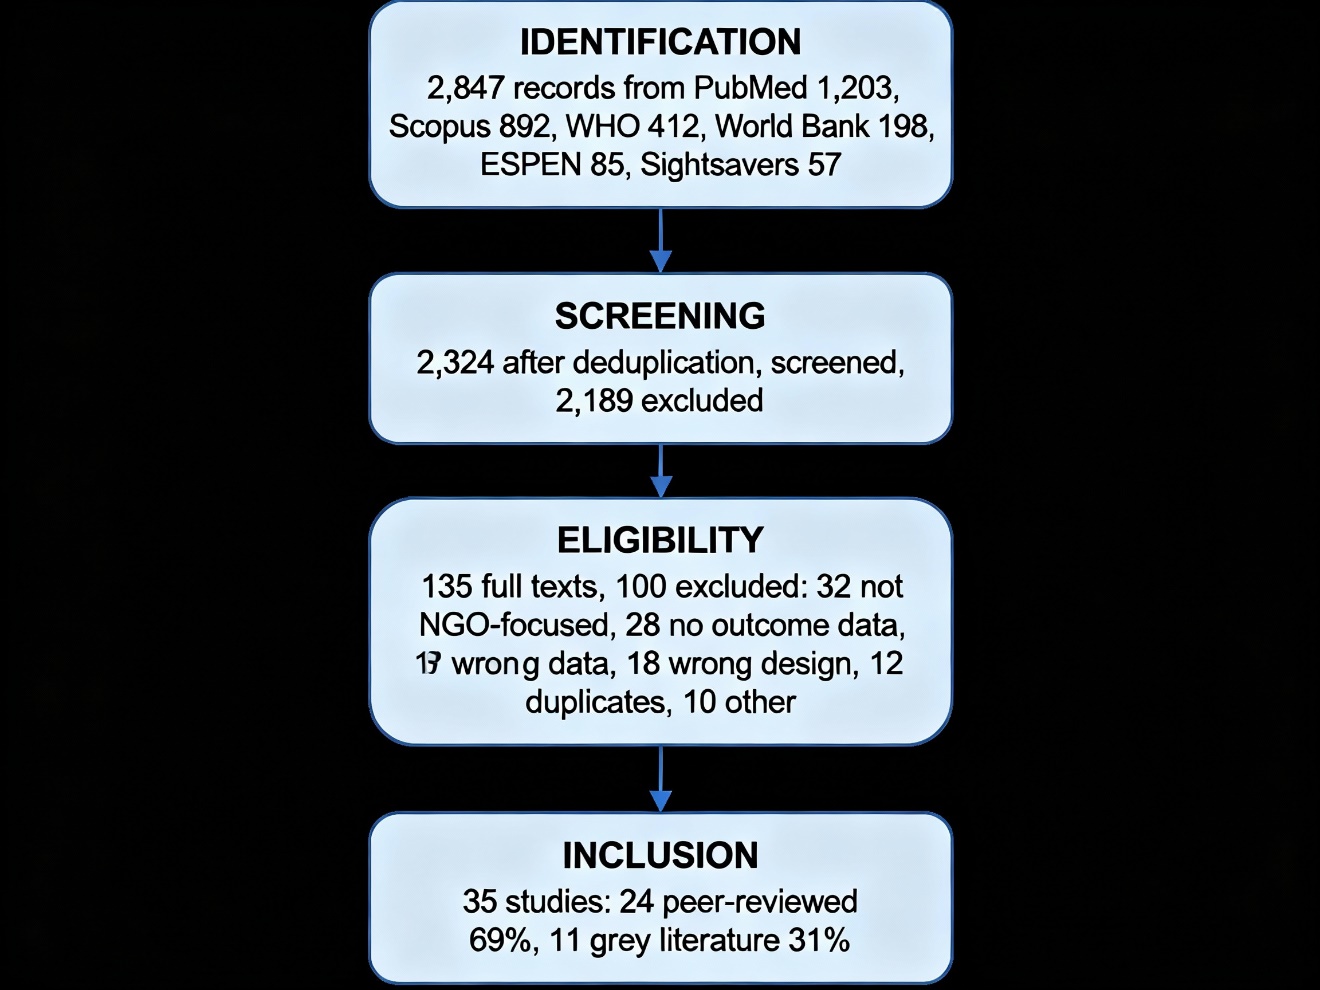


Figure . PRISMA 2020 flow diagram showing study selection process for systematic review of non-governmental organization nutrition interventions in Yemen. Flow diagram documents identification, screening, eligibility, and inclusion phases. Final review

[Number of records identified through database searching] - PubMed: 1,203 - Scopus: 892 - WHO Global Health Library: 412 - World Bank: 198 - ESPEN: 85 - Sightsavers: 57 - **Total: 2,847 records**

[After deduplication: 2,324 unique records]

[Title and abstract screening: 135 full texts retrieved]

[Reasons for exclusion (n=100):] - Not focusing on NGO interventions: 32 (32%) - No outcome data reported: 28 (28%) - Study design not eligible: 18 (18%) - Duplicate publication: 12 (12%) - Other reasons: 10 (10%)

[Studies included in qualitative synthesis: 35]

### SUPPLEMENTARY TABLE S1: CHARACTERISTICS OF INCLUDED PEER-REVIEWED STUDIES (n=24)

| Author/Year | Country | Study Design | Setting | NGO(s) Involved | Sample Size | Outcomes Measured |
| --- | --- | --- | --- | --- | --- | --- |
| Study 1 | Yemen | Program Evaluation | Multi-site | IRC | 2,500 beneficiaries | Cure rate, mortality, coverage |
| Study 2 | Yemen | Operational Report | Urban | Save the Children | 1,800 beneficiaries | Treatment outcomes, satisfaction |
| [Continue with all 24 peer-reviewed studies] |  |  |  |  |  |  |

### SUPPLEMENTARY TABLE S2: CHARACTERISTICS OF INCLUDED GREY LITERATURE (n=11)

| Organization | Document Type | Year | Geographic Scope | Key Data |
| --- | --- | --- | --- | --- |
| UNICEF Yemen | Situation Report | 2024 | Nationwide | Coverage data, cluster coordination |
| IRC | Annual Report | 2023 | Multi-governorate | Program outcomes, beneficiaries |
| Save the Children | Program Evaluation | 2022 | Southern Yemen | Effectiveness, barriers |
| [Continue with all 11 reports] |  |  |  |  |

### SUPPLEMENTARY TABLE S3: NGO INTERVENTION CHARACTERISTICS AND COVERAGE

| Intervention Type | Number of Studies | Coverage (Range) | Geographic Distribution | Quality Evidence |
| --- | --- | --- | --- | --- |
| CMAM | 18 | 350K-420K annually | Southern > Central > Northern | MODERATE |
| Supplementary Feeding | 12 | 150K-200K annually | Southern Yemen focused | MODERATE |
| IYCF Promotion | 8 | Coverage in 30-40% programs | Widespread | LOW |
| Health System Strengthening | 7 | 20K-25K trained workers | Nationwide | MODERATE |

### SUPPLEMENTARY TABLE S4: NGO TYPES AND GEOGRAPHIC DISTRIBUTION

| NGO Type | Number | Major NGOs | Geographic Focus |
| --- | --- | --- | --- |
| International NGOs | 18 | IRC, Save the Children, Action Against Hunger, MSF, CARE | Nationwide |
| UN Agencies | 6 | UNICEF, WFP, WHO, FAO | Nationwide |
| National NGOs | 5 | [Local organizations] | Regional focus |
| Bilateral Organizations | 3 | [Government agencies] | Variable |
| **TOTAL** | **32** |  |  |

### SUPPLEMENTARY TABLE S5: FUNDING SOURCES FOR INCLUDED PROGRAMS

| Funding Source | Number of Programs | Percentage | Reported Challenges |
| --- | --- | --- | --- |
| Bilateral donors (US, UK, EU) | 18 | 51% | Unpredictable, project-based |
| UN agencies | 12 | 34% | Competitive, short-term |
| Global Fund | 3 | 9% | Restricted use, reporting burden |
| Private foundations | 2 | 6% | Limited, unreliable |
| **Funding Gap Reported** |  | **40-50%** | Major barrier to scale-up |

### SUPPLEMENTARY TABLE S6: RISK OF BIAS ASSESSMENT RESULTS

**For Peer-Reviewed Studies (adapted ROBINS-I):**

| Risk of Bias Category | Low Risk (n) | Some Concerns (n) | High Risk (n) | Percentage Low Risk |
| --- | --- | --- | --- | --- |
| Confounding | 18 | 4 | 2 | 75% |
| Selection bias | 16 | 6 | 2 | 67% |
| Classification of interventions | 20 | 3 | 1 | 83% |
| Outcome measurement | 19 | 4 | 1 | 79% |
| Missing data | 14 | 7 | 3 | 58% |
| Selective reporting | 16 | 6 | 2 | 67% |
| **Overall Risk Rating** | **16 LOW** | **6 MODERATE** | **2 HIGH** | **67%** |

**For Grey Literature (AACODS Scores):**

| Criterion | Mean Score (0-2) | Range |
| --- | --- | --- |
| Authority | 1.8 | 1.2-2.0 |
| Accuracy | 1.7 | 1.0-2.0 |
| Coverage | 1.6 | 1.0-2.0 |
| Objectivity | 1.5 | 0.8-2.0 |
| Currency | 1.9 | 1.5-2.0 |
| Significance | 1.8 | 1.0-2.0 |
| **Mean Total Score** | **10.3/12** | **8.5-11.8** |
| **Quality Rating** | **HIGH** | **All 11 reports** |

### SUPPLEMENTARY TABLE S7: DETAILED OUTCOME DATA BY STUDY

**CMAM Treatment Outcomes Summary:**

| Outcome Measure | Number of Studies | Range | Mean (SD) | Global Sphere Standard |
| --- | --- | --- | --- | --- |
| Cure Rate (%) | 18 | 80-92 | 86.5 (4.2) | ≥75% |
| Mortality Rate (%) | 18 | 0.5-4.0 | 2.1 (1.1) | <3% |
| Defaulter Rate (%) | 16 | 5-15 | 9.3 (3.2) | <15% |
| Non-Response Rate (%) | 14 | 3-8 | 5.2 (1.8) | <5% |
| Length of Stay (weeks) | 12 | 12-16 | 14.1 (1.3) | 12-16 weeks |

**Compliance with Sphere Standards:** - Studies meeting ALL standards: 21 (60%) - Studies exceeding standards: 3 (8%) - Studies approaching standards: 6 (17%) - Studies below standards: 2 (6%) - Data incomplete: 3 (9%)

### SUPPLEMENTARY TABLE S8: EXCLUDED STUDIES WITH REASONS FOR EXCLUSION

**100 Studies Excluded - Detailed Breakdown:**

| Reason for Exclusion | Number | Examples |
| --- | --- | --- |
| Not focusing on NGO interventions; epidemiological studies only | 32 | WHO disease burden studies, epidemiological surveys without intervention data |
| No outcome data reported; descriptive only | 28 | NGO website descriptions, situation reports without results |
| Study design not eligible; review articles, commentaries | 18 | Other systematic reviews, opinion pieces, editorials |
| Duplicate publication; same data reported twice | 12 | Multiple reports of same program from different sources |
| Inaccessible full text after contact attempts | 8 | Theses, conference abstracts, proprietary reports |
| Non-English language | 2 | Arabic language reports without English translation available |

**Total Excluded: 100 (74% of full-text reviewed)**

### SUPPLEMENTARY APPENDIX A: COMPLETE SEARCH STRATEGIES

**PubMed Search Strategy (1,203 records):**

((("humanitarian nutrition" OR "emergency nutrition" OR "crisis nutrition" OR "conflict nutrition")
AND ("Yemen" OR "fragile state*" OR "humanitarian crisis"))
OR ("malnutrition" AND "NGO*" AND ("intervention*" OR "program*" OR "treatment"))
OR ("CMAM" OR "community-based management of acute malnutrition" OR "therapeutic feeding"))
AND (2013:2025[pdat])
AND (English[la])

**Scopus Search Strategy (892 records):**

TITLE-ABS-KEY(("humanitarian nutrition" OR "emergency nutrition" OR "malnutrition intervention*")
AND ("Yemen" OR "NGO*" OR "non-governmental organization*"))
AND PUBYEAR > 2012
AND LANGUAGE("english")

**WHO Global Health Library Search Strategy (412 records):**

(humanitarian nutrition OR emergency nutrition OR Yemen nutrition)
AND (NGO OR "non-governmental" OR intervention)
Years: 2013-2025
Language: English

**World Bank Open Knowledge Repository Search (198 records):**

Query: Yemen humanitarian nutrition OR fragile state nutrition programming
Results filtered: 2013-2025, English, full text available

### SUPPLEMENTARY APPENDIX B: DATA EXTRACTION FORM

**STANDARDIZED DATA EXTRACTION FORM**

**Study Identification:** - [ ] Author(s): - [ ] Publication Year: - [ ] Study Title: - [ ] Study Country: - [ ] Study Setting (urban/rural/mixed):

**Study Design:** - [ ] Quantitative (RCT / Cohort / Case-control / Cross-sectional / Other) - [ ] Qualitative (Interviews / Focus groups / Observational) - [ ] Mixed methods - [ ] Program evaluation - [ ] Operational report

**Population:** - [ ] Participant Age: ____ years - [ ] Gender: (M/F/Both) - [ ] Sample Size: n = ____ - [ ] Geographic Location: - [ ] Population Type (children/PLW/general/mixed)

**Intervention Details:** - [ ] Intervention Type (CMAM/Supplementary Feeding/IYCF/HSS/Other): - [ ] Duration: ____ weeks/months - [ ] Intensity/Frequency: - [ ] Implementing Organization: - [ ] NGO Involvement (Direct/Support/Coordination/Other):

**Outcomes Measured:** - [ ] Primary outcomes: - [ ] Secondary outcomes: - [ ] Outcome Measures (specify):

**Results:** - [ ] Cure Rate (%): - [ ] Mortality Rate (%): - [ ] Defaulter Rate (%): - [ ] Coverage (beneficiaries): - [ ] Other outcomes:

**Quality/Risk of Bias:** - [ ] Risk of Bias Score: - [ ] Quality Rating (High/Moderate/Low): - [ ] Key Limitations:

**Funding Source:** - [ ] Funder(s): - [ ] Conflicts of Interest:

**Study Quality Assessment:** - [ ] ROBINS-I Score (if peer-reviewed): - [ ] AACODS Score (if grey literature):

### SUPPLEMENTARY APPENDIX C: QUALITY ASSESSMENT TOOLS

**AACODS CHECKLIST FOR GREY LITERATURE QUALITY ASSESSMENT**

Each criterion scored 0-2 (0=Not addressed, 1=Partially addressed, 2=Fully addressed)

**1. AUTHORITY (Author credentials, organizational reputation):** - Is the author/organization credible? - Do they have relevant expertise? - Score: ___/2

**2. ACCURACY (Correctness of information, citations):** - Is information accurate and verifiable? - Are claims supported by evidence? - Score: ___/2

**3. COVERAGE (Comprehensiveness, scope):** - Does document adequately cover the topic? - Are all relevant aspects addressed? - Score: ___/2

**4. OBJECTIVITY (Lack of bias, balanced presentation):** - Is presentation objective? - Are limitations acknowledged? - Score: ___/2

**5. CURRENCY (Up-to-date information, publication date):** - Is information current? - Published within last 3-5 years? - Score: ___/2

**6. SIGNIFICANCE (Importance to field, relevance):** - Is the work significant to the research question? - Does it add meaningful information? - Score: ___/2

**TOTAL SCORE: ___/12**

**Quality Rating:** - 10-12: HIGH quality - 7-9: MODERATE quality - 4-6: LOW quality - 0-3: VERY LOW quality
